# Supplementary material for: Knowledge, Attitudes, Beliefs, and Practices Towards the Causes of Male Infertility Among Urology Outpatients in Abuja Hospitals
Source: Research Square preprint supplement (doi:10.21203/rs.3.rs-5902036/v1), 2025-01-31
Supplement: Supplementary file 1 [file 274a2f52d20cb19504b7ceef.pdf]

## QUESTIONNAIRE

This questionnaire consists of **5 sections** and **35 questions**. It includes; **Section A:** Sociodemographic data, **Section B:** Knowledge on the causes of male infertility, **Section C:** Attitudes towards the causes of male infertility, **Section D:** Beliefs towards the causes of male infertility, **Section E:** Practices towards the causes of male infertility. Participation in this study is voluntary, any information provided will be strictly confidential and used for intended purposes only. Thank you.

### SECTION A: SOCIODEMOGRAPHIC

- 1) Age at last birthday? \_\_\_\_\_ years
- 2) What is your ethnicity? Please specify \_\_\_\_\_
- 3) What is your religion?
  - a. Christianity
  - b. Islam
  - c. Traditional
  - d. Others (please specify): \_\_\_\_\_
- 4) What is your relationship status?
  - a. Single
  - b. Married
  - c. Cohabiting
  - d. Divorced
  - e. Widowed
  - f. Separated

5) What is your highest level of education?

- a. None
- b. Primary school uncompleted
- c. Primary school completed
- d. Secondary school uncompleted
- e. Secondary school completed
- f. Tertiary school uncompleted
- g. Tertiary school completed

6) What is your occupational status?

- a) Student
- b) Unemployed
- c) Self-employed (please specify type of work) \_\_\_\_\_
- d) Employed (please specify type of work) \_\_\_\_\_
- e) Retired
- f) Others (please specify): \_\_\_\_\_

7) Have you fathered any biological children?

- a. Yes
- b. No

If yes, how many children? \_\_\_\_\_

## SECTION B: KNOWLEDGE ON CAUSES OF MALE INFERTILITY

**TICK ONE OPTION FOR EACH QUESTION**

|    |                                                                                                          |
|----|----------------------------------------------------------------------------------------------------------|
| 8  | After how many months of regular and unprotected sexual intercourse can a man be diagnosed as infertile? |
|    | 0-1 months <input type="checkbox"/>                                                                      |
|    | 2-6 months <input type="checkbox"/>                                                                      |
|    | 7-12 months <input type="checkbox"/>                                                                     |
|    | > 12 months <input type="checkbox"/>                                                                     |
|    | I don't know <input type="checkbox"/>                                                                    |
| 9  | Male infertility is inherited                                                                            |
|    | True <input type="checkbox"/>                                                                            |
|    | False <input type="checkbox"/>                                                                           |
|    | I don't know <input type="checkbox"/>                                                                    |
| 10 | Low sperm count causes infertility.                                                                      |
|    | True <input type="checkbox"/>                                                                            |
|    | False <input type="checkbox"/>                                                                           |
|    | I don't know <input type="checkbox"/>                                                                    |
| 11 | Infertility is caused by sexually transmitted infections.                                                |
|    | True <input type="checkbox"/>                                                                            |
|    | False <input type="checkbox"/>                                                                           |
|    | I don't know <input type="checkbox"/>                                                                    |
| 12 | Damage to sexual organs can cause infertility.                                                           |
|    | True <input type="checkbox"/>                                                                            |
|    | False <input type="checkbox"/>                                                                           |
|    | I don't know <input type="checkbox"/>                                                                    |

**TICK ONE OPTION FOR EACH QUESTION**

|    |                                                                                     |                              |                             |
|----|-------------------------------------------------------------------------------------|------------------------------|-----------------------------|
| 13 | Tight underwear for men can cause infertility                                       |                              |                             |
|    | True                                                                                | <input type="checkbox"/>     |                             |
|    | False                                                                               | <input type="checkbox"/>     |                             |
|    | I don't know                                                                        | <input type="checkbox"/>     |                             |
| 14 | Constant heat around sexual organs can cause infertility.                           |                              |                             |
|    | True                                                                                | <input type="checkbox"/>     |                             |
|    | False                                                                               | <input type="checkbox"/>     |                             |
|    | I don't know                                                                        | <input type="checkbox"/>     |                             |
| 15 | The use of the following can cause male infertility. Choose yes/no for each option. |                              |                             |
|    | Alcohol                                                                             | Yes <input type="checkbox"/> | No <input type="checkbox"/> |
|    | Cigarettes                                                                          | Yes <input type="checkbox"/> | No <input type="checkbox"/> |
|    | Recreational drugs (cocaine, morphine, marijuana)                                   | Yes <input type="checkbox"/> | No <input type="checkbox"/> |
|    | Testosterone replacement therapy                                                    | Yes <input type="checkbox"/> | No <input type="checkbox"/> |
|    | Herbal teas/concoctions (Mai shayi/ special teas)                                   | Yes <input type="checkbox"/> | No <input type="checkbox"/> |
|    | Viagra                                                                              | Yes <input type="checkbox"/> | No <input type="checkbox"/> |
|    | Long term use of steroids                                                           | Yes <input type="checkbox"/> | No <input type="checkbox"/> |
|    | Chemotherapy                                                                        | Yes <input type="checkbox"/> | No <input type="checkbox"/> |
|    | African fan palm (Murucchi/Dubbe/Agbon Oludu/ kemelutu)                             | Yes <input type="checkbox"/> | No <input type="checkbox"/> |
| 16 | Stress can lead to infertility                                                      |                              |                             |
|    | True                                                                                | <input type="checkbox"/>     |                             |
|    | False                                                                               | <input type="checkbox"/>     |                             |
|    | I don't know                                                                        | <input type="checkbox"/>     |                             |

## SECTION C: ATTITUDES TOWARDS THE CAUSES OF MALE INFERTILITY

|    |                                                                  | Strongly<br>disagree     | Disagree                 | Neutral                  | Agree                    | Strongly<br>agree        |
|----|------------------------------------------------------------------|--------------------------|--------------------------|--------------------------|--------------------------|--------------------------|
| 17 | I feel male infertility is a disease                             | <input type="checkbox"/> |
| 18 | I feel it is shameful for a man to be infertile                  | <input type="checkbox"/> |
| 19 | If a couple is infertile, the man should be investigated first   | <input type="checkbox"/> |
| 20 | If a couple is infertile, the woman should be investigated first | <input type="checkbox"/> |
| 21 | If a couple is infertile, they should be investigated together   | <input type="checkbox"/> |

## SECTION D: BELIEFS ON THE CAUSES OF MALE INFERTILITY

|    |                                                                     | Strongly<br>disagree     | Disagree                 | Neutral                  | Agree                    | Strongly<br>agree        |
|----|---------------------------------------------------------------------|--------------------------|--------------------------|--------------------------|--------------------------|--------------------------|
| 22 | Witchcraft can cause infertility.                                   | <input type="checkbox"/> |
| 23 | Early male circumcision can cause infertility.                      | <input type="checkbox"/> |
| 24 | Marrying more than one wife will prevent infertility                | <input type="checkbox"/> |
| 25 | Marrying a virgin female will prevent infertility                   | <input type="checkbox"/> |
| 26 | If a man is not sexually active by age 25, he will become infertile | <input type="checkbox"/> |

|    |                                                                               |                          |                          |                          |                          |                          |
|----|-------------------------------------------------------------------------------|--------------------------|--------------------------|--------------------------|--------------------------|--------------------------|
| 27 | Regular testing for sexually transmitted infections will prevent infertility. | <input type="checkbox"/> |
| 28 | Not all men can impregnate women                                              | <input type="checkbox"/> |

## SECTION E: PRACTICE TOWARDS INFERTILITY

| ANSWER THE QUESTIONS BELOW- TICK THE ANSWER THAT APPLIES TO YOU |                                                                                                     |                          |                          |
|-----------------------------------------------------------------|-----------------------------------------------------------------------------------------------------|--------------------------|--------------------------|
|                                                                 |                                                                                                     | YES                      | NO                       |
| 29                                                              | Would you take herbal supplements to treat infertility?                                             | <input type="checkbox"/> | <input type="checkbox"/> |
| 30                                                              | If confirmed as infertile, would you tell your wife/partner?<br><br>(If yes skip the next question) | <input type="checkbox"/> | <input type="checkbox"/> |
| 31                                                              | If “no” in question 30, would you let your wife/ partner take the blame?                            | <input type="checkbox"/> | <input type="checkbox"/> |
| 32                                                              | If clinically diagnosed with infertility, will you consider any of the options below?               |                          |                          |
|                                                                 | a. Accept it as fate                                                                                | <input type="checkbox"/> | <input type="checkbox"/> |
|                                                                 | b. Adoption of a known child                                                                        | <input type="checkbox"/> | <input type="checkbox"/> |
|                                                                 | c. Adoption of an unknown child                                                                     | <input type="checkbox"/> | <input type="checkbox"/> |
|                                                                 | d. IVF- using sperm of a known person                                                               | <input type="checkbox"/> | <input type="checkbox"/> |
|                                                                 | e. IVF- using sperm of an unknown person                                                            | <input type="checkbox"/> | <input type="checkbox"/> |
|                                                                 | f. Other options (please specify):                                                                  |                          |                          |
| 33                                                              | Would you seek spiritual help for infertility?<br><br>(If No Skip the next question)                | <input type="checkbox"/> | <input type="checkbox"/> |
| 34                                                              | If “yes” in question 33, which options would you consider?                                          |                          |                          |
|                                                                 | a. Faith based organizations e.g., churches, mosques.                                               | <input type="checkbox"/> | <input type="checkbox"/> |
|                                                                 | b. Traditional (Traditional healers)                                                                | <input type="checkbox"/> | <input type="checkbox"/> |

|  |                                    |                          |                          |
|--|------------------------------------|--------------------------|--------------------------|
|  | c. Herbalists (Use of Herbs)       | <input type="checkbox"/> | <input type="checkbox"/> |
|  | d. Other options (please specify): |                          |                          |

35. Have you ever been diagnosed as infertile by a medical doctor?

Yes ☐      No ☐
