# Supplementary material for: Knowledge, Attitudes, Beliefs, and Practices Towards the Causes of Male Infertility Among Urology Outpatients in Abuja Hospitals
Source: Research Square preprint supplement (doi:10.21203/rs.3.rs-5902036/v1), 2025-01-31
Supplement: Supplementary file 1 [file 145261c729a49846d8059a37.xlsx]

## Sheet: Sheet1
S/N	Consent	Age	Ethnicity	Religion	Relationship status	highest level of education	occupational status	have you fathered any biological children	If Yes, how many	Q8	Q9	Q10	Q11	Q12	Q13	Q14	alcohol	cigarette	recreational drugs	testestorone	herbal teas	viagra	steroids	chemotherapy	african fan palm	Q16	Q17	Q18	Q19	Q20	Q21	Q22	Q23	Q24	Q25	Q26	Q27	Q28	Q29	Q30	Q31	Accept it as fate	adoption of known	adoption of unknown	ivf using sperm of known	ivf using sperm of unknown	others	Q33	faith based
1	1	72	Igbo	1	2	2	3	1	6	4	3	1	1	1	1	1	1	1	1	3	2	3	1	1	2	2	5	5	5	5	5	5	5	5	5	5	5	5	1	1		1	1	2	1	2		1	1
2	1	59	Igbo	1	2	1	3	1	6	5	2	1	1	1	1	1	1	2	1	1	1	1	1	2	2	2	5	5	1	1	5	5	1	3	1	1	1	5	1	1		2	2	2	2	2		1	1
3	1	64	Ishan	1	2	7	4	1	2	4	2	1	1	1	2	3	2	2	2	3	2	3	2	2	3	2	1	1	3	3	5	5	1	1	1	1	5	5	1	1		1	1	1	1	1		1	1
4	1	24	Ibibio	1	1	5	1	2	2	3	1	1	1	1	3	1	2	2	2	2	2	2	1	2	2	2	4	3	2	2	4	3	3	3	4	2	4	4	1	1		1	1	2	1	2		1	1
5	1	31	Igbo	1	2	5	3	1	1	4	2	1	1	1	3	2	1	2	1	2	1	1	2	2	2	1	5	1	5	1	1	1	3	1	1	1	1	5	2	1		1	2	1	2	1		2
6	1	21	Igbo	1	1	7	4	2	2	5	2	3	3	1	1	1	1	1	1	2	2	1	1	1	2	1	3	4	3	3	5	3	3	3	3	3	4	2	2	1		2	2	2	2	2		1	1
7	1	32	Igbo	1	2	7	3	2	2	5	2	1	1	1	1	1	1	2	1	2	1	1	2	1	2	1	4	2	1	1	5	1	1	1	1	2	4	4	1	1		1	1	1	2	1		2
8	1	64	Igbo	1	2	5	5	1	3	5	2	1	1	3	2	3	1	1	1	1	1	1	2	2	1	2	5	5	1	1	5	3	3	1	1	5	3	5	2	1		1	1	1	2	2		1	1
9	1	72	Igbo	1	2	3	3	1	7	5	3	1	1	1	2	1	2	1	1	2	1	3	3	3	3	3
10	1	35	Igbo	1	2	5	3	1	2	3	1	1	1	3	1	1	1	1	1	1	2	2	1	1	2	2	3	4	5	1	5	1	1	1	5	1	5	5	1	2	1	1	2	2	1	2		1	1
11	1	44	Yoruba	1	2	5	4	1	4	5	3	3	3	3	3	3	1	1	1	1	1	1	1	1	1	1	1	1	4	2	5	2	1	2	2	2	5	4	1	1		2	2	1	2	2		2
12	1	69	Ekoi	1	5	7	5	1	6	4	2	1	1	1	2	2	2	2	1	2	1	2	1	1	1	2	5	5	5	5	5	3	3	3	3	5	5	4	2	1		1	1	1	1	2		2
13	1	59	Igbo	1	2	5	4	2	7	4	3	1	1	1	3	3	1	2	1	1	1	1	1	3	1	3	5	5	5	5	5	3	4	1	2	3	4	2	1	1		2	1	1	2	1		1	1
14	1	70	Igbo	1	2	5	3	1	2	5	3	1	2	1	3	1	1	1	1	1	1	2	1	1	2	1	4	2	1	1	5	2	1	2	2	2	1	4	1	1		1	1	1	1	1		2
15	1	50	Efik	1	2	7	4	1	4	1	1	1	2	1	2	1	1	1	1	1	2	2	1	2	2	2	4	4	2	4	5	4	1	1	1	1	2	4	1	1		1	1	2	1	2		1	1
16	1	48	Urhobo	1	2	7	4	1	1	5	3	1	1	1	3	1	1	1	1	1	1	1	1	1	1	1	4	2	4	3	4	2	2	2	2	2	4	4	1	1		1	2	2	1	1		1	1
17	1	48	Erei cross river	1	2	7	3	1	5	4	2	1	1	1	3	1	1	1	1	1	1	2	1	1	2	1	4	2	4	2	4	4	2	1	1	2	4	1	1	1		1	1	2	1	2		2
18	1	76	Idoma	1	2	7	5	1	7	1	3	1	1	1	1	1	1	1	1	2	2	1	1	1	1	1	5	5	5	4	5	5	1	3	1	1	5	5	1	1		1	1	2	1	2		1	1
19	1	63	Middle belt	1	2	5	6	1	4	5	3	1	1	1	1	3	1	1	1	2	2	1	3	2	2	2	5	3	4	3	4	3	3	2	2	4	4	4	1	1		1	1	2	2	2		1	1
20	1	47	Mangu	1	2	7	4	1	5	5	2	1	1	1	1	1	1	1	1	2	2	2	1	2	2	2	4	2	2	2	5	4	2	2	2	2	4	4	2	1		2	2	2	1	1		2
21	1	47	Igbo	1	2	7	4	1	6	5	2	1	3	1	1	1	1	1	1	2	1	1	1	1	3	2	4	3	3	3	5	2	2	2	2	2	2	2	2	1		1	1	2	2	2		1	1
22	1	65	Igbo	1	2	7	3	1	5	5	2	1	2	1	2	2	1	1	1	1	1	2	1	2	2	1	5	5	1	1	5	3	1	1	1	1	5	5	1	1		2	1	2	1	2		1	1
23	1	61	Bura	1	2	7	5	1	3	5	2	3	1	1	1	1	1	1	1	2	2	2	2	2	2	3	4	2	4	4	5	1	1	2	1	1	2	2	2	1		2	2	2	1	2		2
24	1	30	Etsako	1	1	7	3	2	7	5	3	3	1	1	3	3	2	2	3	3	3	3	3	3	3	3	4	3	4	4	4	2	3	2	2	3	2	4	1	1		2	2	2	1	2		1	1
25	1	65	Igbo	1	2	7	3	1	5	5	2	1	1	3	1	1	1	1	1	3	1	1	1	1	1	1	5	2	1	1	4	1	1	1	1	4	5	5	2	2	2	2	1	2	1	2		1	1
26	1	29	Yoruba	1	1	7	4	2	7	5	3	1	1	1	1	1	1	1	1	1	1	1	1	1	1	1	1	2	2	1	1	1	1	2	3	2	1	2	1	1		1	1	1	1	1		1	1
27	1	19	Igbo	1	1	5	6	2	7	4	1	1	2	1	1	1	1	1	1	1	1	1	1	1	1	1	3	5	5	4	5	1	2	2	2	3	5	5	1	1		2	1	2	2	2		1	1
28	1	53	Yala local govt C.R.S	1	2	5	3	1	4	1	1	1	2	1	2	1	2	2	2	2	2	2	1	2	2	1	4	3	1	1	4	1	1	1	1	1	4	4	2	1		1	1	1	1	2		2
29	1	80	Gbari	1	2	1	6	1	5	5	3	1	1	1	3	1	1	1	1	1	1	1	1	1	1	3	5	5	2	2	5	1	1	1	1	1	1	1	1			2	1	1	1	1		2
30	1	56	Igbo	1	2	7	4	1	8	5	5	1	1	1	1	3	2	2	2	1	2	2	1	3	2	1	1	1	4	2	4	4	2	2	2	2	4	4	1	1		1	1	1	2	2		2
31	1	64	Hausa	1	2	7	3	1	3	5	3	1	3	1	3	3	3	3	3	3	3	3	3	3	3	3	3	3	3	3	3	3	3	3	3	3	3	3	1			1	2	2	2	2		1	2
32	1	46	Jakun	2	2	7	4	1	7	4	2	1	1	1	2	1	1	1	1	1	2	2	1	1	2	2	5	2	2	2	5	1	1	1	1	1	5	1	2	1		1	2	2	2	2		2
33	1	33	Hausa	2	2	5	4	1	1	5	1	1	3	3	1	1	2	2	2	2	2	2	2	2	2	3	3	1	1	1	5	1	1	1	1	1	3	5	2	1		1	1	1	1	2		1	1
34	1	20	Igala	2	1	6	1	2	7	5	2	3	3	3	2	2	1	1	1	1	2	1	1	2	1	3	2	3	4	3	4	2	2	2	2	2	4	4	1	1		1	1	1	2	2		2
35	1	34	Kogi	2	1	6	2	2	7	4	2	1	1	1	1	1	2	2	2	2	2	2	2	2	2	1	4	5	3	3	5	1	3	5	5	1	5	5	1	2	1	1	1	2	2	2		1	1
36	1	40	Igala	1	2	7	4	1	2	5	2	1	2	1	1	3	1	1	2	2	2	2	2	1	2	1	4	2	3	3	5	2	2	2	2	3	5	3	1	1		1	1	1	2	1		1	1
37	1	63	Yoruba	2	2	7	5	1	6	3	2	1	1	1	1	1	1	1	1	1	1	2	1	3	1	2	2	4	5	4	5	2	1	1	1	2	5	5	2	1		1	1	2	2	2		2
38	1	58	Igbo	1	2	7	4	1	0	5	2	1	1	1	1	1	2	2	1	1	2	2	1	1	2	1	5	5	5	3	5	3	2	1	2	2	4	4	1	1		1	2	1	1	2		1	1
39	1	55	Hausa	2	2	1	3	2	0	4	2	1	3	1	1	2	2	2	2	3	2	3	3	3	3	1	5	1	1	1	5	1	1	1	1	1	1	5	1	1		1	1	2	2	2		1	1
40	1	61	Igbo	1	4	7	3	2	0	5	2	2	1	1	1	1	1	1	1	2	1	1	1	1	1	1	3	3	5	1	5	4	3	3	1	3	4	4	2	1		1	1	2	1	2		1	1
41	1	59	Igbo	2	2	7	5	1	9	5	3	1	1	1	2	3	2	2	1	1	1	2	1	1	1	2	3	2	3	3	5	3	1	1	1	2	4	5	1	1		1	1	1	1	2		1	1
42	1	57	Gade	1	2	7	4	1	0	5	2	1	3	3	3	3	2	2	1	2	2	2	2	2	2	2	4	3	4	4	4	4	1	1	1	4	2	4	1	1		2	1	2	2	2		1	1
43	1	61	Nigena	1	2	4	3	1	7	5	3	2	2	1	3	3	1	1	1	3	3	3	3	3	3	1	3	3	3	3	1	1	3	3	3	3	1	3	2	1		2	2	2	1	2		1	2
44	1	47	Tiv	1	2	7	4	1	5	5	3	1	3	1	3	1	2	2	2	1	2	2	2	2	2	3	5	3	3	3	5	1	1	1	1	1	5	5	1	1		1	1	2	2	2		1	1
45	1	33	Jonjo	1	1	5	3	2	7	1	3	1	1	1	1	1	1	2	1	1	2	3	1	1	1	1	1	2	5	5	4	2	1	5	4	2	3	1	1	1		1	1	1	1	2		1	1
46	1	52	Boki	1	2	7	4	1	4	5	2	1	2	1	1	1	1	1	1	2	2	2	3	3	2	2	4	4	4	2	5	4	4	2	2	2	2	4	1	1		1	1	2	1	2		1	1
47	1	38	Igbo	2	2	5	4	1	8	2	1	1	3	3	2	3	3	3	3	3	3	3	3	3	3	3	3	4	3	2	4		3	3	3	3	3	3	2	1		2	2	2	2	2		2
48	1	66	Igbo	1	6	7	3	1	4	5	3	1	1	1	1	1	1	2	2	3	3	3	1	1	3	1	3	1	1	1	1	3	3	3	1	1	4	5	2	1		2	1	2	1	2		2
49	1	57	Edo	1	2	7	4	1	5	1	2	1	1	2	1	1	1	1	1	3	1	1	1	1	1	1	3	2	4	2	4	1	1	1	1	1	5	5	2	1		1	2	1	2	1		2
50	1	64	Igbo	1	2	7	5	1	5	5	3	1	1	1	1	2	2	2	1	3	2	3	3	1	3	1	4	4	3	3	5	3	1	2	2	2	4	3	2	1		2	1	2	1	2		1	1
51	1	63	Urhobo	1	6	7	5	1	7	4	2	1	1	1	1	1	1	1	1	2	3	1	3	2	3	2	3	1	1	2	5	3	1	1	1	1	5	5	1	1		1	2	2	2	2		1	2
52	1	33	Igbo	1	2	6	3	1	8	2	1	1	1	1	3	3	2	2	2	1	2	2	2	3	2	3	4	5	4	4	5	4	2	2	2	2	4	5	1	1		1	2	2	2	2		1	1
53	0	48	Benin	1	2	5	3	2	0	4	1	1	1	1	2	2	2	2	2	2	1	1	1	3	3	1	5	5	1	1	5	5	3	1	1	1	5	5	1	1		1	1	1	2	2		1	1
54	0
55	0
56	0
57	0
58	0
59	0
60	0
61	1	42	ijaw	1	2	7	4	1	2	5	2	1	1	1	1	1	1	1	1	3	2	1	1	2	2	2	4	5	5	3	5	1	1	4	2	2	5	5	1	1		2	2	2	2	1	cunsulting a genuine medical specialist for help	2
62	1	59	igbo	1	2	7	4	1	3	5	2	1	1	1	1	1	1	2	1	1	1	1	1	1	1	1	4	4	4	2	4	2	2	2	2	4	4	2	1	1		1	2	2	1	2		1	1
63	1	50	yoruba	2	2	7	3	1	3	5	2	1	1	1	1	1	1	2	1	1	1	1	1	1	2	1	5	5	1	1	5	3	1	1	1	1	2	5	1	1		2	2	2	1	2		1	1
64	1	54	igbo	1	5	5	4	1	5	5	1	1	1	1	1	1	1	2	2	3	1	1	1	2	1	1	4	4	4	4	4	2	2	2	2	2	4	4	2	2	2	1	1	1	1	1		1	1
65	1	20	edo	1	1	7	2	2	0	5	3	1	1	1	1	3	2	2	2	1	1	2	2	2	2	1	1	3	4	4	4	3	2	2	2	4	5	5	2	1		2	1	2	2	2		1	1
66	1	68	hausa	2	2	7	5	1	4	5	2	1	1	1	1	1	2	2	1	1	1	1	1	1	3	1	3	5	5	5	5	2	2	1	1	1	5	5	2	1		1	1	2	2	2		2
67	1	47	yoruba	1	2	5	3	1	3	2	2	2	2	1	2	1	1	1	1	1	1	1	1	2	3	1	5	2	2	5	4	3	1	1	1	1	1	1	1	1		1	1	1	1	1		1	1
68	1	24	igbo	1	1	6	1	2	0	5	2	1	2	1	2	1	2	2	1	1	2	2	1	1	2	3	4	5	4	3	4	3	2	2	1	1	4	1	2	1		2	1	1	2	1		2
69	1	70	nupe	2	2	7	5	1	0	5	3	3	3	3	3	3	2	2	2	3	3	2	3	3	3	3	3	1	4	3	5	2	2	2	2	2	4	4	1	1		1	1	1	1	2		2
70	1	31		1	2	6	3	1	1	5	2	1	1	1	1	1	1	2	2	1	2	1	1	2	2	1	4	3	2	2	4	4	4	3	3	3	4	4	1	2	1	2	2	2	2	2	treatment and prayers	1	1
71	1	70	ogoja	1	5	5	5	1	8	2	1	1	1	1	3	1	2	1	1	3	2	2	2	2	2	2	2	5	4	4	5	1	1	1	2	5	2	5	1	1		1	1	1	1	1		2
72	1	60	yoruba	1	2	7	5	1	0	5	2	1	1	1	3	3	1	1	2	2	2	2	2	2	2	1	2	2	4	4	4	4	2	2	2	2	2	2	1	1		1	1	2	1	1		1	2
73	1	42	yoruba	2	2	7	4	1	3	5	2	1	1	1	1	1	1	1	1	1	1	1	1	1	1	2	4	3	4	4	5	1	1	5	1	2	5	4	1	1		2	1	2	2	2		2
74	1	45	igbo	1	2	5	3	1	1	5	3	1	3	3	3	3	1	1	1	3	3	3	3	3	3	3	3	3	3	3	3	3	3	3	3	3	3	3	1	1		2	2	2	2	2		1	2
75	1	26	igbo	1	1	7	3	2	0	5	3	1	1	1	2	2	2	2	2	2	2	2	1	1	2	1	2	1	3	3	5	4	1	1	1	1	1	5	1	1		2	2	1	1	2		2
76	1	26	mandawari	2	1	5	4	1	4	5	2	1	1	1	1	1	1	1	1	3	2	3	3	1	2	2	4	4	4	4	4	2	2	2	2	4	2	4	2	1		2	1	1	2	2		2
77	1	57	hausa	1	2	7	4	1	3	5	1	1	2	1	2	3	2	2	1	1	2	2	1	1	2	1	4	5	4	4	5	4	1	1	2	2	4	5	1	1		1	2	1	1	2		1	1
78	1	49	igbo	1	2	7	3	1	0	3	2	1	1	1	1	1	1	1	1	1	1	1	1	1	1	1	5	5	1	1	5	1	1	1	1	3	5	5	2	1		1	1	2	1	2		1	1
79	1	53	alago	2	2	7	4	1	5	4	2	1	1	1	3	2	3	3	3	3	3	3	3	1	3	3	5	2	5	4	5	2	2	1	2	4	4	4	2			1	1	1	2	2		1	1
80	1	70	ijaw	1	2	7	5	1	5	5	2	1	1	1	1	1	2	2	1	1	2	1	1	3	2	3	4	4	3	3	5	2	4	1	1	2	3	4	1	1		1	1	2	2	1		1	2
81	1	20	ekiti	1	1	5	3	2	0	2	1	1	1	1	3	1	1	3	3	2	3	2	3	3	2	1	4	4	4	4	4	2	2	2	2	2	4	4	2	1		1	1	1		1		1	1
82	1	70	yoruba	2	2	5	5	1	6	1	1	1	1	1	3	1	1	1	1	3	1	1	1	1	1	1	5	5	5	5	5	3	1	1	3	1	5	5	2	2	2	1	2	2	2	2		1	1
83	1	48	idoma	1	2	7	4	1	2	2	3	1	3	1	1	1	1	2	1	2	2	3	1	1	3	3	3	1	1	1	1	1	1	1	1	1	3	5	1	1			1	2	2	2		2
84	1	68	igala	1	2	7	5	1	7	5	2	1	1	1	1	1	1	1	1	3	1	3	3	3	3	1	5	5	2	2	5	4	1	1	1	4	4	4	2	1			2	1	2	1		1	1
85	1	20	idoma	1	1	5	1	2	0	5	3	1	3	1	3	1	1	1	1	1	1	1	2	1	2	2	5	1	3	3	5	2	1	1	1	2	4	5	2	1		1	1	2	2	2		2
86	1	35	ibibio	1	2	7	3	1	2	4	2	2	1	1	1	1	2	2	2	1	1	2	3	1	3	1	5	1	1	1	5	1	1	1	1	1	5	5	1	1			1	1				1	1
87	1	54	effik	1	2	7	4	1	6	1	2	1	1	1	2	1	3	3	3	1	3	3	3	3	3	2	4	4	2	2	5	1	2	2	2	2	4	5	1	1		1						1	1
88	1	24	idoma	1	1	6	3	2	0	5	2	1	1	1	2	3	2	2	1	1	1	1	1	3	1	3	4	5	2	2	5	2	3	1	1	1	5	4	1	1		1						2
89	1	38	hausa	1	2	5	3	2	0	1	2	1	1	1	1	1	1	1	1	2	1	1	1	1	1	1	2	4	4	4	4	4	2	4	2	2	4	4	2	2	2		1	1	1	1		1	1
90	1	18	bekoma	1	1	6	1	2	0	5	1	3	2	1	3	1	1	1	2	1	2	2	1	3	1	1	4	5	4	4	4	4	4	4	4	5	5	4	1	1		1	1	1	1	1		1	1
91	1	64	ibibio	1	2	6	5	2	0	5	2	2	2	1	2	2	1	2	2	3	2	1	2	3	2	1	2	1	1	1	5	5	1	1	1	1	5	5	1	1			1		2	2		1	1
92	1	64	yoruba	1	2	7	5	1	4	5	3	1	3	1	1	1	1	1	1	3	3	2	1	1	3	1	3	1	3	3	5	3	3	1	1	1	5	3	1	1		2	1	1	2	2		1	1
93	1	59	igbo	1	2	4	3	1	5	5	3	1	1	1	1	1	1	1	1	1	1	1	1	1	1	1	1	1	1	1	1	2	1	2	2	2	1	1	1	1		1	1	2	1	2		1	1
94	1	39	igbo	1	1	7	3	2	0	5	2	1	2	2	1	3	1	1	1	1	2	1	1	1	1	3	3	5	3	3	5	1	1	1	1	1	1	1	1	1		1						2
95	1	54	alago	2	2	7	4	1	0	5	1	1	3	1	3	3	1	1	1	2	2	1	1	1	2	3	4	4	5	5	5	3	2	2	2	3	4	4	2	1		1						2
96	1	53	ogoja	1	2	7	4	1	4	1	3	2	1	1	2	2	1	1	1	2	2	2	2	2	2	2	2	2	5	2	5	5	4	2	2	1	4	4	2	1				2				1	2
97	1	51	ika	1	2	7	3	1	0	2	2	1	2	1	1	1	3	3	1	3	3	3	3	3	3	1	3	2	4	2	4	2	2	2	2	2	2	4	1	1			1					1	1
98	1	27	igbo	1	1	7	2	2	0	4	2	1	1	1	3	1	1	1	1	2	2	1	1	1	2	2	4	1	3	3	5	2	4	1	1	1	4	5	1	1			1		1			1	1
99	1	49	igbo	1	2	5	3	2	0	5	2	1	3	1	2	1	1	1	1	2	1	1	1	2	2	3	4	4	4	4	4	2	2	2	2	2	4	4	1	1				1				1	2
100	1	45	hausa	2	2	7	4	1	6	5	3	1	1	1	3	3	1	1	1	1	2	2	2	2	2	3	4	4	4	3	5	3	1	3	3	3	4	3	1	1		1	1	2	2	2		1	1
101	1	32	igbo	1	2	7	4	1	2	1	2	1	1	1	2	2	2	2	2	1	2	2	1	1	3	2	3	5	5	3	5	2	2	2	2	3	3	5	1	1		1	2	1	2	2		1	1
102	1	62	ebira	2	2	7	5	1	3	5	2	1	1	1	1	1	1	2	1	3	2	3	1	3	3	1	2	1	1	1	5	4	3	3	3	3	5	4	1	1		1						1	2
103	1	65	fulani	2	2	5	4	1	5	5	2	1	1	1	2	2	1	1	1	1	2	1	2	1	2	2	1	2	3	2	5	1	1	1	1	1	5	3	2	1		1	1	2	2			2
104	1	64	yoruba	1	2	7	5	1	5	2	2	1	3	1	3	3	2	2	1	1	2	2	1	1	2	3	3	4	1	1	5	3	1	1	1	1	5	4	1	1						1		1	1
105	1	65	berom	1	2	1	4	1	8	5	3	1	1	1	3	1	1	3	1	1	3	1	3	3	3	1	5	5	5	4	5	3	1	1	1	3	5	5	2	1		1	2	2	2			2
106	1	35	bachama	1	2	5	3	1	3	5	1	1	1	1	1	1	2	2	1	1	2	2	2	1	2	1	4	2	1	1	4	4	2	2	2	2	4	4	1	1			2	2	1	2		2
107	1	27	igbo	2	1	6	3	2	0	5	1	1	3	1	3	3	1	1	1	1	1	1	1	1	1	1	4	2	3	3	5	1	3	2	1	1	5	4	1	1		1	1	2	2	2		2
108	1	43	Boi	1	2	5	3	1	3	1	1	1	1	1	1	1	1	2	2	2	2	2	2	2	2	1	4	1	1	4	4	4	1	4	4	4	1	4	1	1		1	2	2	2	2		2
109	1	62	Yoruba	1	2	7	5	1	3	2	2	1	1	1	1	1	2	2	2	2	2	2	2	2	2	1	1	1	5	5	5	5	5	1	1	1	1	5	1	1		1	1	1	2	2		1	1
110	1	57	Gade	1	2	7	4	1	4	2	1	1	1	1	1	1	2	2	2	2	2	2	2	2	2	2	5	5	5	5	5	2	1	1	1	1	1	5	2	1		1	2	2	2	2		2
111	1	55	Igbo	1	2	7	3	1	2	5	3	3	3	3	1	1	1	1	1	1	1	1	1	1	1	1	4	2	2	4	4	4	2	1	1	1	4	4	2	1		1	1	1	1	1		1	1
112	1	62	Igbo	1	2	7	5	1	4	5	2	1	1	1	1	1	1	1	1	1	1	1	1	1	1	1	1	2	5	1	4	2	1	1	1	2	4	5	2	1		2	2	2	2	2		2
113	1	47	Yoruba	1	2	7	4	1	5	5	2	1	2	1	3	3	2	2	1	2	2	2	2	2	2	3	5	2	5	3	5	2	2	2	2	2	2	5	1	1		1	1	1	2	2		1	1
114	1	71	Igbo	2	2	3	3	1	8	2	2	2	3	2	2	2	2	2	1	1	2	1	1	1	2	2	2	4	3	3	5	3	3	3	3	1	3	3	1	1		1	2	2	2	2		2
115	1	70	Boki	1	2	3	5	1	4	1	2	1	3	1	2	1	1	1	2	2	1	1	1	1	1	2	4	5	3	3	5	5	1	4	2	4	1	5	2	1		1	1	2	2	2		2
116	1	46	Jaba	1	2	7	4	1	3	4	2	1	1	1	1	1	1	1	1	1	1	1	1	1	1	1	4	4	2	2	5	2	2	2	2	2	5	4	2	1		1	1	1	2	2		1	1
117	1	64	Igbo	1	2	7	5	1	5	5	2	1	1	1	1	1	2	2	1	2	2	2	1	1	2	3	5	3	3	3	5	3	1	3	2	1	5	3	1	1		2	1	1	2	2		1	1
118	1	57	Igbo	1	2	7	4	1	1	4	2	1	1	1	1	1	1	1	1	1	1	1	1	1	1	2	4	2	4	2	4	3	2	1	1	5	4	4	2	1		1	2	2	2	2		1	1
119	1	67	Igbo	1	2	7	5	1	5	2	2	1	1	1	1	1	1	1	1	1	1	2	1	1	2	1	5	4	2	2	5	1	1	1	3	2	3	3	2	1		2	1	2	2	2		2
120	1	54	Igbo	1	2	7	4	1	3	5	2	1	1	1	2	3	1	2	2	1	1	2	1	1	2	1	4	2	2	4	5	1	1	1	1	2	4	4	2	1		1	2	2	2	2		1	1
121	1	23	Yoruba	2	2	5	2	2	0	5	1	1	1	1	3	2	1	1	2	1	2	1	1	1	2	3	3	5	5	4	1	3	1	4	3	2	4	5	2	1		2	2	1	2	1		1	1
122	1	22	Igbo	1	1	6	1	2	0	3	1	1	1	1	2	3	1	1	1	2	2	2	1	2	2	3	1	5	1	5	1	5	4	4	4	1	5	1	1	2	2	2	2	2	2	2	Pray and fasting	1	1
123	1	25	Hausa	2	2	5	3	1	1	2	2	1	1	1	1	2	2	1	1	2	2	2	2	2	2	1	2	4	2	4	4	4	2	2	2	2	4	4	1	1		1	1	2	2	2		2
124	1	46	Igbo	1	2	7	4	1	4	5	2	1	1	1	3	1	1	2	1	2	1	1	1	1	2	1	1	3	3	3	1	1	2	2	2	5	5	4	2	1		2	1	2	2	2		2
125	1	63	Yoruba	2	2	7	5	1	6	3	2	1	1	1	1	1	1	1	1	1	1	2	1	1	1	3	4	5	4	4	5	2	1	2	2	1	4	4	2	1		1	2	2	2	2		2
126	1	46	Bajju	1	2	5	4	2	0	2	2	1	1	1	2	1	2	1	2	1	2	2	1	1	2	1	4	4	4	4	4	2	2	2	2	2	4	4	2	1		1	2	2	2	2		1	1
127	1	61	Igbo	1	4	7	3	2	0	5	3	3	1	1	1	1	2	2	1	1	2	1	1	1	2	1	1	3	5	2	5	4	3	2	1	1	4	4	1	1		2	1	1	1	2		1	1
128	1	35	Nupe	2	1	7	4	2	0	5	2	1	1	1	2	2	2	2	1	1	2	1	1	1	1	1	5	2	4	1	5	5	1	5	1	5	1	5	2	1		2	2	2	1	2		1	1
129	1	44	Delta	1	2	5	4	2	0	2	2	1	1	1	1	1	2	2	2	2	2	1	1	1	1	2	2	2	4	4	4	4	4	2	2	4	2	4	1	2	2	1	2	2	2	2		1	1
130	1	27	Igbo	1	2	7	3	2	0	4	2	1	1	1	1	1	1	1	1	2	1	1	1	1	2	2	5	5	2	2	5	1	1	1	1	1	1	5	1	2	2	2	2	2	2	2		1	1
131	1	25	Ebira	2	1	6	1	2	0	2	2	1	2	1	3	3	1	1	1	1	1	1	1	1	2	3	4	5	2	2	5	4	2	1	2	1	5	5	1	1		1	2	2	1	2		2
132	1	18	Nupe	2	1	6	1	2	0	5	2	1	1	1	2	2	1	1	1	2	2	1	1	2	1	1	4	3	3	3	5	1	1	1	1	1	4	5	1	1		1	1	1	2	2		2
133	1	52	Yoruba	2	2	7	4	1	3	4	1	1	2	2	1	1	2	2	2	1	2	1	1	1	1	3	5	4	2	5	5	1	2	1	1	2	4	5	1	1		2	2	1	2	1	Mutual consent of couple to allow copulation between wife and unknown man	1	1
134	1	53	Yoruba	2	2	7	3	1	3	3	1	1	1	1	1	1	1	1	1	2	1	1	1	1	2	1	5	2	2	2	4	5	2	2	2	2	4	4	1	1		2	1	1	2	2		1	1
135	1	55	Fulani	3	6	4	5	1	5	5	2	1	1	1	2	1	2	2	1	2	1	1	1	1	1	1	3	4	3	3	5	5	1	1	1	1	3	5	2	1		1	2	1	2	1		1	1
136	1	32	Igala	2	1	7	4	2	0	4	1	1	1	1	2	2	2	2	1	1	2	2	1	1	2	3	2	1	1	1	5	3	2	1	1	1	2	4	1	1		1	2	1	1	1		1	1
137	1	22	Yoruba	2	1	7	4	2	0	2	2	1	2	1	1	1	1	2	1	2	1	1	1	1	2	1	2	5	1	1	5	5	1	1	1	1	1	5	1	2	2	1	1	1	2	2		1	1
138	1	29	Hausa	1	1	6	3	2	0	5	2	1	1	1	2	1	2	2	1	1	1	1	1	1	1	3	2	3	3	2	5	3	1	1	1	1	3	5	2	2	2	2	2	1	2	1		1	1
139	1	43	Fulani	2	2	7	4	1	4	3	2	1	1	1	1	1	1	1	1	1	2	1	1	1	2	2	4	2	4	3	4	3	2	2	2	2	4	4	2	1		2	1	2	2	2		2
140	1	33	Calabar	1	2	7	4	1	1	5	3	1	1	1	2	3	2	2	2	1	2	2	2	2	2	1	5	5	1	5	5	5	1	1	1	1	1	1	2	1		2	2	1	2	2		1	1
141	1	32	Hausa	1	1	7	4	2	0	5	1	1	1	1	2	3	2	2	2	1	1	1	1	1	2	1	4	5	4	4	5	3	1	2	2	2	4	4	1	1		2	2	2	2	2	6	2
142	1	23	Edo	1	1	6	1	2	0	3	1	1	1	1	1	1	1	1	1	1	1	1	1	1	1	1	4	5	5	1	5	4	1	1	1	1	1	4	2	1		2	1	1	1	1		1	1
143	1	22	Edo	1	1	7	1	2	0	4	2	1	3	1	2	1	2	1	2	1	2	2	1	1	2	2	2	4	3	3	5	1	1	1	1	1	5	4	2	1		1	1	1	2	1		2
144	1	28	Ibibio	1	1	6	1	2	0	3	3	1	1	1	1	1	1	1	1	2	1	2	1	1	1	1	2	2	3	3	5	2	2	2	2	2	5	4	2	1		2	2	2	1	2		1	1
145	1	23	Bachama	1	1	6	1	2	0	4	3	1	1	1	2	1	1	1	1	2	2	2	1	1	2	1	4	2	2	2	5	4	2	2	1	2	4	2	1	1		2	1	1	1	1		1	1
146	1	25	Nupe	2	1	6	1	2	0	4	1	1	1	1	1	1	1	1	1	1	2	2	1	1	2	3	4	2	5	3	5	3	3	2	1	1	3	5	2	1		1	1	1	2	2		2
147	1	33	Hausa	1	2	6	4	1	8	5	2	1	1	1	1	1	2	2	2	1	2	2	2	2	2	3	5	5	4	4	5	2	1	1	1	4	1	4	1	2	2	1	2	1	1	1		1	1
148	1	38	Itsekiri	1	2	7	4	1	4	4	2	1	1	1	1	1	1	1	1	2	1	2	1	2	1	1	1	1	3	3	4	4	3	1	1	2	4	2	2	1		1	2	2	2	2		1	1
149	1	37	Ebira	2	1	7	4	2	0	5	3	1	3	1	3	3	1	1	1	2	2	2	1	2	2	3	1	3	4	3	5	2	3	3	2	2	4	4	1	1		1	2	2	2	2		2
150	1	42	Yoruba	1	2	7	4	1	1	5	1	1	2	1	1	1	1	1	1	1	1	1	1	1	1	1	2	1	2	2	5	4	3	1	1	2	4	4	1	1		2	2	2	2	2		1	1
151	1	51	Calabar	1	2	7	4	1	2	5	2	1	1	1	1	1	1	1	1	2	1	1	1	1	2	1	5	5	5	4	5	5	1	1	1	3	5	5	1	1		2	1	1	1	1		1	1
152	1	58	Idoma	1	2	7	5	1	4	1	2	1	1	1	1	1	1	1	1	1	1	1	1	1	1	1	5	4	4	2	5	4	1	1	1	4	4	4	2	1		1	2	2	2	2		1	1
153	1	38	Idoma	1	2	7	3	1	3	5	2	1	1	1	2	3	2	2	2	2	2	2	2	2	2	3	4	4	4	2	4	2	2	2	2	2	4	4	2	1		1	2	2	2	2		1	1
154	1	60	Idoma	1	2	7	5	1	5	3	1	1	1	1	3	1	1	2	1	1	1	1	1	1	1	1	5	5	4	3	5	5	2	2	1	2	5	4	2	1		2	1	2	1	2		1	1
155	1	63	Igbo	1	2	7	5	1	5	2	1	1	1	1	2	3	1	1	1	1	1	2	1	2	2	1	4	4	3	3	4	4	4	4	2	4	5	4	1	1		1	1	1	1	1		1	1
156	1	50	Idoma	1	2	7	4	1	4	3	1	1	2	1	3	3	2	2	2	1	2	2	1	1	1	1	2	2	2	2	5	2	2	2	2	2	4	4	2	1		1	1	1	2	1		2
157	1	46	Idoma	1	2	7	3	1	2	4	2	1	2	1	2	2	1	1	1	1	2	1	1	1	2	2	3	4	2	2	4	2	2	2	2	2	4	4	2	1		1	1	1	2	1		2
158	1	65	Gbagyi	2	2	3	3	1	14	5	3	3	3	3	3	3	1	2	1	2	2	1	2	2	2	3	4	2	2	4	5	2	4	2	2	1	5	4	1	1		1	2	2	2	2		2
159	1	40	Gbagyi	2	1	6	4	2	0	4	2	1	1	1	2	2	1	1	1	1	1	1	1	1	2	1	4	4	5	5	5	2	2	2	2	4	4	4	1	1		2	1	2	2	2		1	1
160	1	53	Yoruba	2	2	7	4	1	3	4	2	1	1	1	1	3	1	2	1	2	2	2	1	2	2	3	4	2	3	3	4	4	2	2	2	3	2	4	1	1		2	1	2	1	2		1	1
161	1	55	Yoruba	1	2	7	4	1	2	4	2	1	2	1	1	1	1	1	1	2	2	2	1	1	2	2	2	2	2	2	5	1	2	1	1	1	4	4	1	1		2	2	2	2	1		1	1
162	1	58	Esan	1	2	7	4	1	4	1	2	1	1	1	1	1	1	1	1	1	1	1	1	2	2	1	1	4	4	4	5	3	2	1	1	2	2	4	1	1		2	1	2	2	2		1	1
163	1	33	Igbo	1	1	7	4	1	1	2	2	1	1	1	1	1	1	1	1	1	1	1	1	1	1	3	5	4	5	3	5	2	2	2	2	2	2	5	2	1		1	2	2	2	2		1	1
164	1	37	Hausa	2	2	7	4	1	3	5	1	1	2	1	1	1	1	1	1	1	2	1	1	2	1	2	1	2	4	3	1	5	1	3	3	3	3	4	1	1		2	2	2	2	2		1	1
165	1	43	Atyap	1	2	7	4	1	1	4	2	1	1	1	1	1	2	1	2	2	2	2	2	2	2	1	3	2	3	3	5	3	1	1	1	1	3	4	2	1		1	1	1	2	2		1	1
166	1	47	Edo	1	2	7	4	1	2	4	1	1	1	1	1	1	1	1	1	1	1	1	1	1	2	1	2	2	2	2	4	4	2	1	1	2	1	3	2	2	2	2	1	2	2	2		2
167	1	53	Igala	1	2	7	6	1	5	5	2	1	3	1	2	1	2	2	1	1	2	2	2	2	2	3	1	1	1	2	5	5	1	2	2	1	1	5	1	1		1	2	2	2	2		1	1
168	1	47	Hausa	2	2	6	4	1	4	5	3	1	1	1	2	1	1	2	1	2	2	2	1	2	2	2	5	3	1	1	5	2	3	2	5	3	5	5	2	1		1	1	1	2	2		1	1
169	1	30	Igbo	1	2	7	4	1	4	3	2	1	1	1	1	1	1	1	1	1	1	2	2	2	2	2	4	3	1	3	3	3	2	1	1	2	3	1	1	1		1	1	1	2	2		1	1
170	1	45	Hausa	2	2	7	3	1	4	5	2	1	1	1	3	3	2	2	2	1	2	2	1	1	1	2	4	2	3	3	4	3	3	3	2	2	4	3	2	1		2	2	2	2	2	6	2
171	1	31	Idoma	1	2	6	1	2	0	4	2	1	1	1	1	1	1	1	1	1	1	1	1	1	1	1	5	5	3	3	5	1	1	3	1	1	5	5	2	1		1	1	1	2	1		1	1
172	1	31	Igbo	1	1	7	4	2	0	5	3	1	1	1	1	1	1	1	1	2	2	2	1	1	2	1	3	3	3	3	4	3	2	1	1	1	4	3	1	1		1	1	1	2	2		1	1
173	1	39	Idoma	1	1	6	4	2	0	3	1	1	1	1	1	1	1	1	1	2	1	2	1	2	2	1	2	2	3	3	3	1	2	4	4	4	4	4	1	1		1	2	2	2	2		2
174	1	72	Igbo	1	2	7	5	1	6	3	2	1	2	2	1	1	1	1	1	1	1	1	1	1	2	3	1	2	1	3	4	1	4	4	3	2	2	2	1	2	2	1	2	2	2	2		2
175	1	65	Igbo	1	2	7	5	1	3	3	2	1	1	1	2	2	2	2	1	1	2	2	2	2	2	2	1	2	3	4	3	2	2	2	3	3	3	3	1	2	2	1	2	2	2	2		2
176	1	22	Idoma	1	1	6	1	2	0	3	1	1	1	1	2	2	1	1	1	1	2	2	2	2	2	1	1	2	1	2	3	3	2	2	2	3	3	2	1	1		1	2	2	2	2		1	1
177	1	55	Hausa	2	2	4	3	1	4	3	1	1	1	1	2	2	2	2	1	1	1	2	2	2	2	2	2	1	2	3	2	1	2	3	1	2	2	4	1	1		2	2	1	2	2		1	1
178	1	25	Esan	1	1	6	1	2	0	3	2	1	1	3	2	2	2	2	2	2	1	1	1	1	2	2	2	3	3	2	2	2	3	4	3	3	4	5	1	1		1	2	1	1	1		2
179	1	41	Nupe	2	2	6	3	1	3	1	1	1	1	1	2	1	1	1	2	2	2	1	1	1	1	3	1	1	3	3	5	3	1	1	1	1	4	4	1	1		1	2	2	2	2		1	1
180	1	39	Yoruba	2	2	7	3	1	2	3	2	1	1	1	2	3	1	1	1	1	1	1	2	2	2	3	2	1	2	3	3	3	2	1	3	3	3	1	1	1		1	1	1	1	1		1	1
181	1	42	Marghi	1	2	5	4	1	1	5	2	1	1	1	1	1	1	1	1	2	2	2	2	2	2	2	4	2	2	2	4	1	1	2	2	2	5	5	1	1		1	1	1	1	1		2
182	1	65	Igbo	1	2	7	2	1	2	4	2	1	1	1	1	1	1	2	1	1	1	1	1	2	2	1	2	4	4	2	2	1	5	1	1	3	5	5	2	1		1	1	2	2	2		2
183	1	63	Marghi	1	2	7	5	1	7	5	1	1	1	1	1	1	1	1	1	2	2	1	2	2	2	1	5	1	5	5	5	5	1	2	1	1	4	5	1	1		1	1	1	2	2		1	1
184	1	55	Hausa	2	2	5	3	1	7	5	3	3	3	3	3	3	1	1	1	2	2	2	2	2	2	3	3	2	1	4	5	1	1	3	3	3	1	1	1	1		1	1	1	1	1		1	1
185	1	23	Igala	2	1	6	1	2	0	4	2	1	1	1	1	1	1	1	1	2	1	1	1	1	2	3	1	1	4	4	5	5	1	1	1	1	1	5	2	2	2	2	2	2	2	2		2
186	1	75	Idoma	1	2	4	5	1	5	1	2	1	2	2	2	1	1	1	1	1	1	1	1	1	1	2	2	2	2	3	3	1	4	3	3	3	2	2	1	1		1	1	1	1	1		1	1
187	1	46	Yoruba	2	2	7	3	1	5	4	1	1	1	1	3	3	1	1	2	2	2	1	1	1	1	3	2	2	2	2	5	5	5	3	3	3	5	5	1	1		1	2	2	2	2		1	1
188	1	38	Edo	1	2	5	3	1	4	3	1	1	1	1	1	1	2	2	2	2	1	1	1	1	1	1	1	3	2	3	3	1	1	3	3	3	3	4	1	2	2	1	2	2	2	2		1	2
189	1	47	Yoruba	2	2	7	4	1	3	4	2	1	1	1	1	1	1	1	1	2	2	1	1	1	1	1	4	2	4	4	5	4	2	2	2	2	4	4	1	1		2	2	1	2	1		1	1
190	1	65	Gbagyi	1	2	4	5	1	7	2	2	1	3	1	1	1	2	2	2	1	1	1	2	2	2	3	2	3	1	2	5	5	3	2	2	1	5	4	1	2	2	2	2	1	2	1		1	1
191	1	44	Igbo	1	2	7	3	1	2	5	3	3	3	1	3	2	1	1	1	2	2	2	2	2	2	2	2	1	3	1	3	1	2	4	4	2	1	2	1	1		1	1	1	1	1		1	1
192	1	22	Gade	1	1	6	1	2	0	4	2	1	1	1	1	1	1	1	1	1	1	1	1	1	1	1	1	1	4	4	5	3	1	2	2	1	4	5	1	2	2	1	2	2	1	2		2
193	1	35	Hausa	2	2	6	3	1	5	5	2	1	3	1	3	1	1	1	2	2	1	1	2	2	2	1	5	4	3	3	4	1	1	4	4	2	4	4	1	2	2	1	2	2	2	2		2
194	1	55	Igbo	1	2	7	4	1	3	5	1	1	1	1	1	1	1	1	1	1	1	2	1	1	1	1	1	4	3	5	5	4	1	2	2	1	4	4	2	1		2	2	1	2	1		1	1
195	1	75	Idoma	1	2	6	5	1	5	5	2	3	1	1	3	1	1	1	1	2	1	1	3	3	3	2	1	2	1	3	4	1	2	1	3	3	2	1	1	1		1	2	1	2	1		1	1
196	1	73	Igbo	1	2	3	5	1	8	5	2	1	1	1	1	1	2	2	2	2	2	2	2	2	2	1	2	1	1	2	2	2	1	5	5	5	5	4	1	1		2	2	2	2	2		2
197	1	26	Igbo	1	1	7	2	2	0	4	1	1	1	1	2	1	2	2	2	1	2	2	1	2	2	1	1	4	5	3	5	1	2	1	2	3	5	2	2	1		2	1	2	2	1		2
198	1	65	Yoruba	2	2	7	5	1	5	4	2	1	3	3	1	1	2	2	1	2	2	2	1	1	2	3	4	3	4	4	5	2	1	3	2	3	3	2	2	1		1	2	2	2	2		2
199	1	39	Yoruba	2	2	7	3	1	0	3	2	1	1	1	1	1	1	1	1	1	2	1	1	1	2	1	5	4	1	5	4	4	2	1	1	4	1	4	1	1		1	2	2	2	2		2
200	1	48	Hausa	2	2	4	4	1	0	1	1	1	1	1	1	1	1	1	2	2	2	2	2	2	2	1	1	1	2		5	5	2	5	5	5	5	4	1	1		2	2	2	2	2
[truncated: 4 more columns]
